# Supplementary material for: Association of Chemoradiotherapy With Thoracic Vertebral Fractures in Patients With Esophageal Cancer
Source: PubMed Central journal article supplement (PMC7489848; doi:10.1001/jamanetworkopen.2020.13952), 2020-09-01
Supplement: jamanetwopen-e2013952-s001.pdf [file jamanetwopen-e2013952-s001.pdf]

## Supplementary Online Content

Fujii K, Sakanaka K, Uozumi R, et al. Association of chemoradiotherapy with thoracic vertebral fractures in patients with esophageal cancer. *JAMA Netw Open*. 2020;3(9):e2013952. doi:10.1001/jamanetworkopen.2020.13952

**eFigure.** The Delineation of Trabecular Bone Portion (Axial and Sagittal View)

**eTable 1.** Univariable and Multivariable Analyses Using the Fine and Gray Subdistribution Hazards Model With Observation Truncated at 3 Years

**eTable 2.** Univariable and Multivariable Analyses Using the Cox Proportional Hazards Model

**eTable 3.** Univariable and Multivariable Analyses Using the Cox Proportional Hazards Model With Observation Truncated at 3 Years

**eTable 4.** Hazards Model With Chemoradiotherapy Plus Clinical Stages

**eTable 5.** Shared Frailty Model for Single Thoracic Vertebral Fracture Including Maximum Radiation Dose

**eTable 6.** Shared Frailty Model for Single Thoracic Vertebral Fracture Including Thoracic Levels of the Vertebra

**eTable 7.** Fine and Gray Subdistribution Hazards Model to Evaluate the Effect of Chemotherapy on Thoracic Vertebral Fractures in Non-CRT Group (n = 196)

This supplementary material has been provided by the authors to give readers additional information about their work.

## eFigure. The Delineation of Trabecular Bone Portion (Axial and Sagittal View)

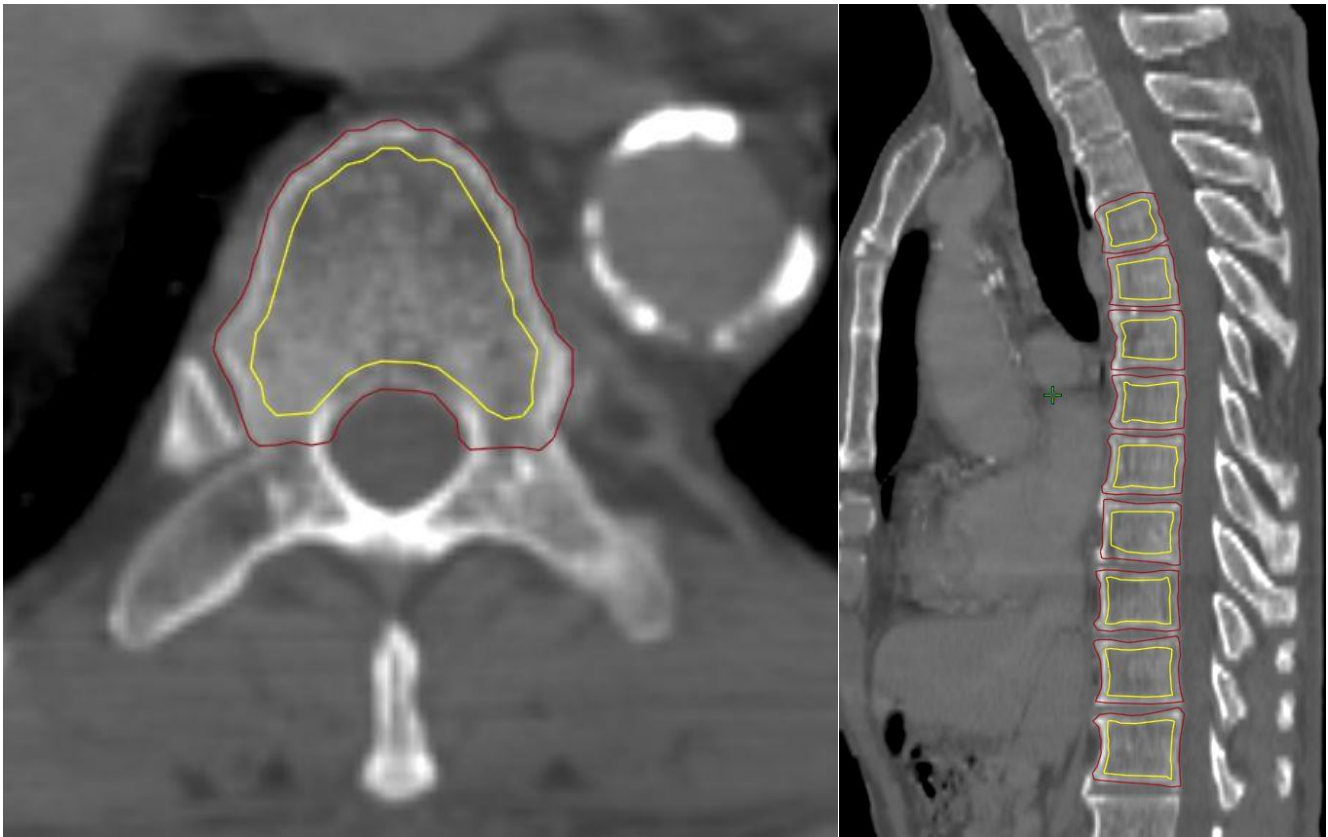

Figure legends: The brown contours meant vertebral bodies. The yellow contours meant the trabecular bone portions. The trabecular portions were created by cropping 3 mm below the surface of the brown contours. Eclipse treatment planning system version 13.7 (Varian Medical Systems, Palo Alto, USA) was used for the analysis.

**eTable 1. Univariable and Multivariable Analyses Using the Fine and Gray Subdistribution Hazards Model With Observation Truncated at 3 Years**

|                                                                                                   |        | Number of patients | Number of events | Univariable         |         | Multivariable (Chemoradiotherapy plus univariable) |         |                     |         |                     |         |
|---------------------------------------------------------------------------------------------------|--------|--------------------|------------------|---------------------|---------|----------------------------------------------------|---------|---------------------|---------|---------------------|---------|
|                                                                                                   |        |                    |                  | HR (95% CI)         | p value | HR (95% CI)                                        | p value | HR (95% CI)         | p value | HR (95% CI)         | p value |
| <b>Chemoradiotherapy</b>                                                                          | Yes    | 119                | 14 (11.8%)       | 3.91<br>(1.41–10.9) | 0.009   | 3.59<br>(1.28–10.1)                                | 0.02    | 4.54<br>(1.59–13.0) | 0.005   | 3.46<br>(1.20–10.0) | 0.02    |
|                                                                                                   | No     | 196                | 5 (2.6%)         | 1                   |         | 1                                                  |         | 1                   |         | 1                   |         |
| <b>Age, years</b>                                                                                 | ≥ 65   | 172                | 16 (9.3%)        | 4.56<br>(1.31–15.8) | 0.02    | 4.16<br>(1.17–14.8)                                | 0.03    |                     |         |                     |         |
|                                                                                                   | < 65   | 143                | 3 (2.1%)         | 1                   |         | 1                                                  |         |                     |         |                     |         |
| <b>Gender</b>                                                                                     | Female | 56                 | 8 (14.3%)        | 6.14<br>(2.38–15.8) | < 0.001 |                                                    |         | 4.25<br>(1.67–10.8) | 0.002   |                     |         |
|                                                                                                   | Male   | 259                | 11 (4.2%)        | 1                   |         |                                                    |         | 1                   |         |                     |         |
| <b>Clinical Stage<br/>(Union for<br/>International Cancer<br/>Control 6<sup>th</sup> edition)</b> | III    | 97                 | 7 (7.2%)         | 2.35<br>(0.70–7.93) | 0.17    |                                                    |         |                     |         |                     |         |
|                                                                                                   | II     | 93                 | 8 (8.6%)         | 2.69<br>(0.82–8.86) | 0.10    |                                                    |         |                     |         |                     |         |
|                                                                                                   | I      | 125                | 4 (3.2%)         | 1                   |         |                                                    |         |                     |         |                     |         |
| <b>Body mass index,<br/>kg / m<sup>2</sup></b>                                                    | ≤ 21.4 | 158                | 12 (7.6%)        | 1.69<br>(0.67–4.29) | 0.27    |                                                    |         |                     |         |                     |         |
|                                                                                                   | > 21.4 | 157                | 7 (4.5%)         | 1                   |         |                                                    |         |                     |         |                     |         |
| <b>History of<br/>habitual drinking</b>                                                           | Yes    | 282                | 13 (4.6%)        | 0.24<br>(0.09–0.63) | 0.004   |                                                    |         |                     |         |                     |         |
|                                                                                                   | No     | 33                 | 6 (18.2%)        | 1                   |         |                                                    |         |                     |         |                     |         |
| <b>History of<br/>habitual smoking</b>                                                            | Yes    | 263                | 13 (4.9%)        | 0.40<br>(0.15–1.06) | 0.07    |                                                    |         |                     |         |                     |         |
|                                                                                                   | No     | 52                 | 6 (11.5%)        | 1                   |         |                                                    |         |                     |         |                     |         |
| <b>History of vertebral<br/>or hip fractures</b>                                                  | Yes    | 23                 | 6 (26.1%)        | 6.14<br>(2.38–15.8) | < 0.001 |                                                    |         |                     |         | 5.22<br>(1.87–14.6) | 0.002   |
|                                                                                                   | No     | 292                | 13 (4.5%)        | 1                   |         |                                                    |         |                     |         | 1                   |         |

Abbreviations: HR = hazard ratio; CI = confidence interval.

**eTable 2. Univariable and Multivariable Analyses Using the Cox Proportional Hazards Model**

|                                                                                       |        | Number of patients | Number of events | Univariable         |         | Multivariable (Chemoradiotherapy plus univariable) |         |                     |         |                     |         |
|---------------------------------------------------------------------------------------|--------|--------------------|------------------|---------------------|---------|----------------------------------------------------|---------|---------------------|---------|---------------------|---------|
|                                                                                       |        |                    |                  | HR (95% CI)         | p value | HR (95% CI)                                        | p value | HR (95% CI)         | p value | HR (95% CI)         | p value |
| <b>Chemoradiotherapy</b>                                                              | Yes    | 119                | 20 (16.8%)       | 4.05<br>(1.78–9.19) | < 0.001 | 3.73<br>(1.64–8.49)                                | 0.002   | 5.34<br>(2.29–12.5) | < 0.001 | 3.54<br>(1.54–8.12) | 0.003   |
|                                                                                       | No     | 196                | 8 (4.1%)         | 1                   |         | 1                                                  |         | 1                   |         | 1                   |         |
| <b>Age, years</b>                                                                     | ≥ 65   | 172                | 22 (12.8%)       | 3.33<br>(1.35–8.22) | 0.009   | 2.99<br>(1.21–7.40)                                | 0.02    |                     |         |                     |         |
|                                                                                       | < 65   | 143                | 6 (4.2%)         | 1                   |         | 1                                                  |         |                     |         |                     |         |
| <b>Gender</b>                                                                         | Female | 56                 | 10 (17.9%)       | 3.01<br>(1.38–6.55) | 0.005   |                                                    |         | 4.52<br>(2.01–10.2) | < 0.001 |                     |         |
|                                                                                       | Male   | 259                | 18 (6.9%)        | 1                   |         |                                                    |         | 1                   |         |                     |         |
| <b>Clinical Stage (Union for International Cancer Control 6<sup>th</sup> edition)</b> | III    | 97                 | 9 (9.3%)         | 1.85<br>(0.75–4.57) | 0.18    |                                                    |         |                     |         |                     |         |
|                                                                                       | II     | 93                 | 9 (9.7%)         | 1.36<br>(0.55–3.36) | 0.50    |                                                    |         |                     |         |                     |         |
|                                                                                       | I      | 125                | 10 (8.0%)        | 1                   |         |                                                    |         |                     |         |                     |         |
| <b>Body mass index, kg / m<sup>2</sup></b>                                            | ≤ 21.4 | 158                | 15 (9.5%)        | 1.25<br>(0.60–2.63) | 0.55    |                                                    |         |                     |         |                     |         |
|                                                                                       | > 21.4 | 157                | 13 (8.3%)        | 1                   |         |                                                    |         |                     |         |                     |         |
| <b>History of habitual drinking</b>                                                   | Yes    | 282                | 21 (7.4%)        | 0.27<br>(0.11–0.63) | 0.003   |                                                    |         |                     |         |                     |         |
|                                                                                       | No     | 33                 | 7 (21.2%)        | 1                   |         |                                                    |         |                     |         |                     |         |
| <b>History of habitual smoking</b>                                                    | Yes    | 263                | 21 (8.0%)        | 0.55<br>(0.23–1.29) | 0.17    |                                                    |         |                     |         |                     |         |
|                                                                                       | No     | 52                 | 7 (13.5%)        | 1                   |         |                                                    |         |                     |         |                     |         |
| <b>History of vertebral or hip fractures</b>                                          | Yes    | 23                 | 7 (30.4%)        | 5.63<br>(2.36–13.5) | < 0.001 |                                                    |         |                     |         | 4.36<br>(1.81–10.5) | 0.001   |
|                                                                                       | No     | 292                | 21 (7.2%)        | 1                   |         |                                                    |         |                     |         | 1                   |         |

Abbreviations: HR = hazard ratio; CI = confidence interval.

**eTable 3. Univariable and Multivariable Analyses Using the Cox Proportional Hazards Model With Observation Truncated at 3 Years**

|                                                                                       |        | Number of patients | Number of events | Univariable         |         | Multivariable (Chemoradiotherapy plus univariable) |         |                     |         |                     |         |
|---------------------------------------------------------------------------------------|--------|--------------------|------------------|---------------------|---------|----------------------------------------------------|---------|---------------------|---------|---------------------|---------|
|                                                                                       |        |                    |                  | HR (95% CI)         | p value | HR (95% CI)                                        | p value | HR (95% CI)         | p value | HR (95% CI)         | p value |
| <b>Chemoradiotherapy</b>                                                              | Yes    | 119                | 14 (11.8%)       | 4.41<br>(1.59–12.2) | 0.004   | 4.08<br>(1.47–11.4)                                | 0.007   | 5.58<br>(1.98–15.7) | 0.001   | 3.82<br>(1.36–10.7) | 0.01    |
|                                                                                       | No     | 196                | 5 (2.6%)         | 1                   |         | 1                                                  |         | 1                   |         | 1                   |         |
| <b>Age, years</b>                                                                     | ≥ 65   | 172                | 16 (9.3%)        | 4.60<br>(1.34–15.8) | 0.02    | 4.21<br>(1.23–14.5)                                | 0.02    |                     |         |                     |         |
|                                                                                       | < 65   | 143                | 3 (2.1%)         | 1                   |         | 1                                                  |         |                     |         |                     |         |
| <b>Gender</b>                                                                         | Female | 56                 | 8 (14.3%)        | 3.57<br>(1.44–8.89) | 0.006   |                                                    |         | 4.84<br>(1.92–12.3) | < 0.001 |                     |         |
|                                                                                       | Male   | 259                | 11 (4.2%)        | 1                   |         |                                                    |         | 1                   |         |                     |         |
| <b>Clinical Stage (Union for International Cancer Control 6<sup>th</sup> edition)</b> | III    | 97                 | 7 (7.2%)         | 3.29<br>(0.96–11.3) | 0.06    |                                                    |         |                     |         |                     |         |
|                                                                                       | II     | 93                 | 8 (8.6%)         | 3.00<br>(0.90–9.96) | 0.07    |                                                    |         |                     |         |                     |         |
|                                                                                       | I      | 125                | 4 (3.2%)         | 1                   |         |                                                    |         |                     |         |                     |         |
| <b>Body mass index, kg / m<sup>2</sup></b>                                            | ≤ 21.4 | 158                | 12 (7.6%)        | 1.83<br>(0.72–4.66) | 0.20    |                                                    |         |                     |         |                     |         |
|                                                                                       | > 21.4 | 157                | 7 (4.5%)         | 1                   |         |                                                    |         |                     |         |                     |         |
| <b>History of habitual drinking</b>                                                   | Yes    | 282                | 13 (4.6%)        | 0.23<br>(0.09–0.59) | 0.003   |                                                    |         |                     |         |                     |         |
|                                                                                       | No     | 33                 | 6 (18.2%)        | 1                   |         |                                                    |         |                     |         |                     |         |
| <b>History of habitual smoking</b>                                                    | Yes    | 263                | 13 (4.9%)        | 0.43<br>(0.16–1.13) | 0.09    |                                                    |         |                     |         |                     |         |
|                                                                                       | No     | 52                 | 6 (11.5%)        | 1                   |         |                                                    |         |                     |         |                     |         |
| <b>History of vertebral or hip fractures</b>                                          | Yes    | 23                 | 6 (26.1%)        | 6.30<br>(2.39–16.6) | < 0.001 |                                                    |         |                     |         | 5.11<br>(1.93–13.6) | 0.001   |
|                                                                                       | No     | 292                | 13 (4.5%)        | 1                   |         |                                                    |         |                     |         | 1                   |         |

Abbreviations: HR = hazard ratio; CI = confidence interval.

**eTable 4. Hazards Model With Chemoradiotherapy Plus Clinical Stages**

|                                                                            |     | Number of patients | Observation      |                                             |         |                                |         | Observation truncated at 3 years |                                             |         |                                |         |
|----------------------------------------------------------------------------|-----|--------------------|------------------|---------------------------------------------|---------|--------------------------------|---------|----------------------------------|---------------------------------------------|---------|--------------------------------|---------|
|                                                                            |     |                    | Number of events | Fine and Gray subdistribution hazards model |         | Cox proportional hazards model |         | Number of events                 | Fine and Gray subdistribution hazards model |         | Cox proportional hazards model |         |
|                                                                            |     |                    |                  | HR (95% CI)                                 | p value | HR (95% CI)                    | p value |                                  | HR (95% CI)                                 | p value | HR (95% CI)                    | p value |
| <b>Chemoradiotherapy</b>                                                   | Yes | 119                | 20<br>(16.8%)    | 4.00<br>(1.60–10.0)                         | 0.003   | 4.14<br>(1.77–9.69)            | 0.001   | 14<br>(11.8%)                    | 4.62<br>(1.43–15.0)                         | 0.01    | 4.65<br>(1.60–13.5)            | 0.005   |
|                                                                            | No  | 196                | 8<br>(4.1%)      | 1                                           |         | 1                              |         | 5<br>(2.6%)                      | 1                                           |         | 1                              |         |
| <b>Clinical Stage (Union for International Cancer Control 6th edition)</b> | III | 97                 | 9<br>(9.3%)      | 0.76<br>(0.29–1.98)                         | 0.58    | 1.30<br>(0.52–3.26)            | 0.58    | 7<br>(7.2%)                      | 1.46<br>(0.38–5.53)                         | 0.58    | 2.18<br>(0.63–7.63)            | 0.22    |
|                                                                            | II  | 93                 | 9<br>(9.7%)      | 1.37<br>(0.55–3.37)                         | 0.50    | 1.59<br>(0.64–3.93)            | 0.32    | 8<br>(8.6%)                      | 3.14<br>(0.98–9.98)                         | 0.05    | 3.47<br>(1.04–11.6)            | 0.04    |
|                                                                            | I   | 125                | 10<br>(8.0%)     | 1                                           |         | 1                              |         | 4<br>(3.2%)                      | 1                                           |         | 1                              |         |

Abbreviations: HR = hazard ratio; CI = confidence interval.

**eTable 5. Shared Frailty Model for Single Thoracic Vertebral Fracture Including Maximum Radiation Dose**

| <b>Factors</b>                                  | <b>Hazard ratio<br/>(95% confidence interval)</b> | <b>p value</b> |
|-------------------------------------------------|---------------------------------------------------|----------------|
| <b>5-Gy increase of maximum radiation dose</b>  | 1.14<br>(1.01–1.28)                               | 0.039          |
| <b>5-units increase of mean Hounsfield unit</b> | 0.89<br>(0.84–0.93)                               | < 0.001        |
| <b>Female</b>                                   | 3.05<br>(1.35–6.90)                               | 0.007          |

**eTable 6. Shared Frailty Model for Single Thoracic Vertebral Fracture Including Thoracic Levels of the Vertebra**

| Factors                                  |     | Multivariable including mean radiation dose |         | Multivariable including maximum radiation dose |         |
|------------------------------------------|-----|---------------------------------------------|---------|------------------------------------------------|---------|
|                                          |     | HR (95% CI)                                 | p value | HR (95% CI)                                    | p value |
| 5-Gy increase of mean radiation dose     |     | 1.42<br>(1.17–1.74)                         | 0.001   |                                                |         |
| 5-Gy increase of maximum radiation dose  |     |                                             |         | 1.19<br>(1.01–1.39)                            | 0.03    |
| 5-units increase of mean Hounsfield unit |     | 0.88<br>(0.84–0.93)                         | < 0.001 | 0.88<br>(0.84–0.93)                            | < 0.001 |
| Female                                   |     | 4.41<br>(1.86–10.4)                         | 0.001   | 3.18<br>(1.38–7.36)                            | 0.007   |
| Thoracic levels of the vertebra          |     |                                             |         |                                                |         |
|                                          | T4  | 1                                           |         | 1                                              |         |
|                                          | T5  | 2.02<br>(0.18–22.3)                         | 0.57    | 1.68<br>(0.15–18.5)                            | 0.67    |
|                                          | T6  | 1.88<br>(0.17–20.8)                         | 0.61    | 1.40<br>(0.13–15.5)                            | 0.78    |
|                                          | T7  | 4.07<br>(0.41–40.2)                         | 0.23    | 2.33<br>(0.24–22.6)                            | 0.47    |
|                                          | T8  | 11.05<br>(1.26–96.8)                        | 0.03    | 4.90<br>(0.59–40.8)                            | 0.14    |
|                                          | T9  | 7.33<br>(0.77–69.5)                         | 0.08    | 3.53<br>(0.39–31.8)                            | 0.26    |
|                                          | T10 | 6.20<br>(0.60–63.7)                         | 0.13    | 3.01<br>(0.31–29.2)                            | 0.34    |
|                                          | T11 | 3.46<br>(0.18–64.8)                         | 0.41    | 1.02<br>(0.06–16.7)                            | 0.99    |
|                                          | T12 | 26.43<br>(1.91–366)                         | 0.02    | 5.63<br>(0.53–59.5)                            | 0.15    |

Abbreviations: HR = hazard ratio; CI = confidence interval.

Footnote: Interpretation should be careful because of the wide CI constructed from the small number of events in each thoracic levels of vertebra.



**eTable 7. Fine and Gray Subdistribution Hazards Model to Evaluate the Effect of Chemotherapy on Thoracic Vertebral Fractures in Non-CRT Group (n = 196)**

|                     |     | Number of patients | Number of events (%) | Hazard ratio (95% confidence interval) | p value |
|---------------------|-----|--------------------|----------------------|----------------------------------------|---------|
| <b>Chemotherapy</b> | Yes | 83                 | 5 (6.0%)             | 1.93 (0.46–8.15)                       | 0.37    |
|                     | No  | 113                | 3 (2.7%)             | 1                                      |         |

Footnote: Interpretation should be careful because of the limited sample size and number of events in non-chemoradiotherapy group.
